# Supplementary figures and images for: Highly Efficient Adsorption of Aqueous Pb(II) with Mesoporous Metal-Organic Framework-5: An Equilibrium and Kinetic Study
Source: Hindawi journal article supplement (doi:10.1155/2016/8095737), 2016-01-01

**Supplementary Material**


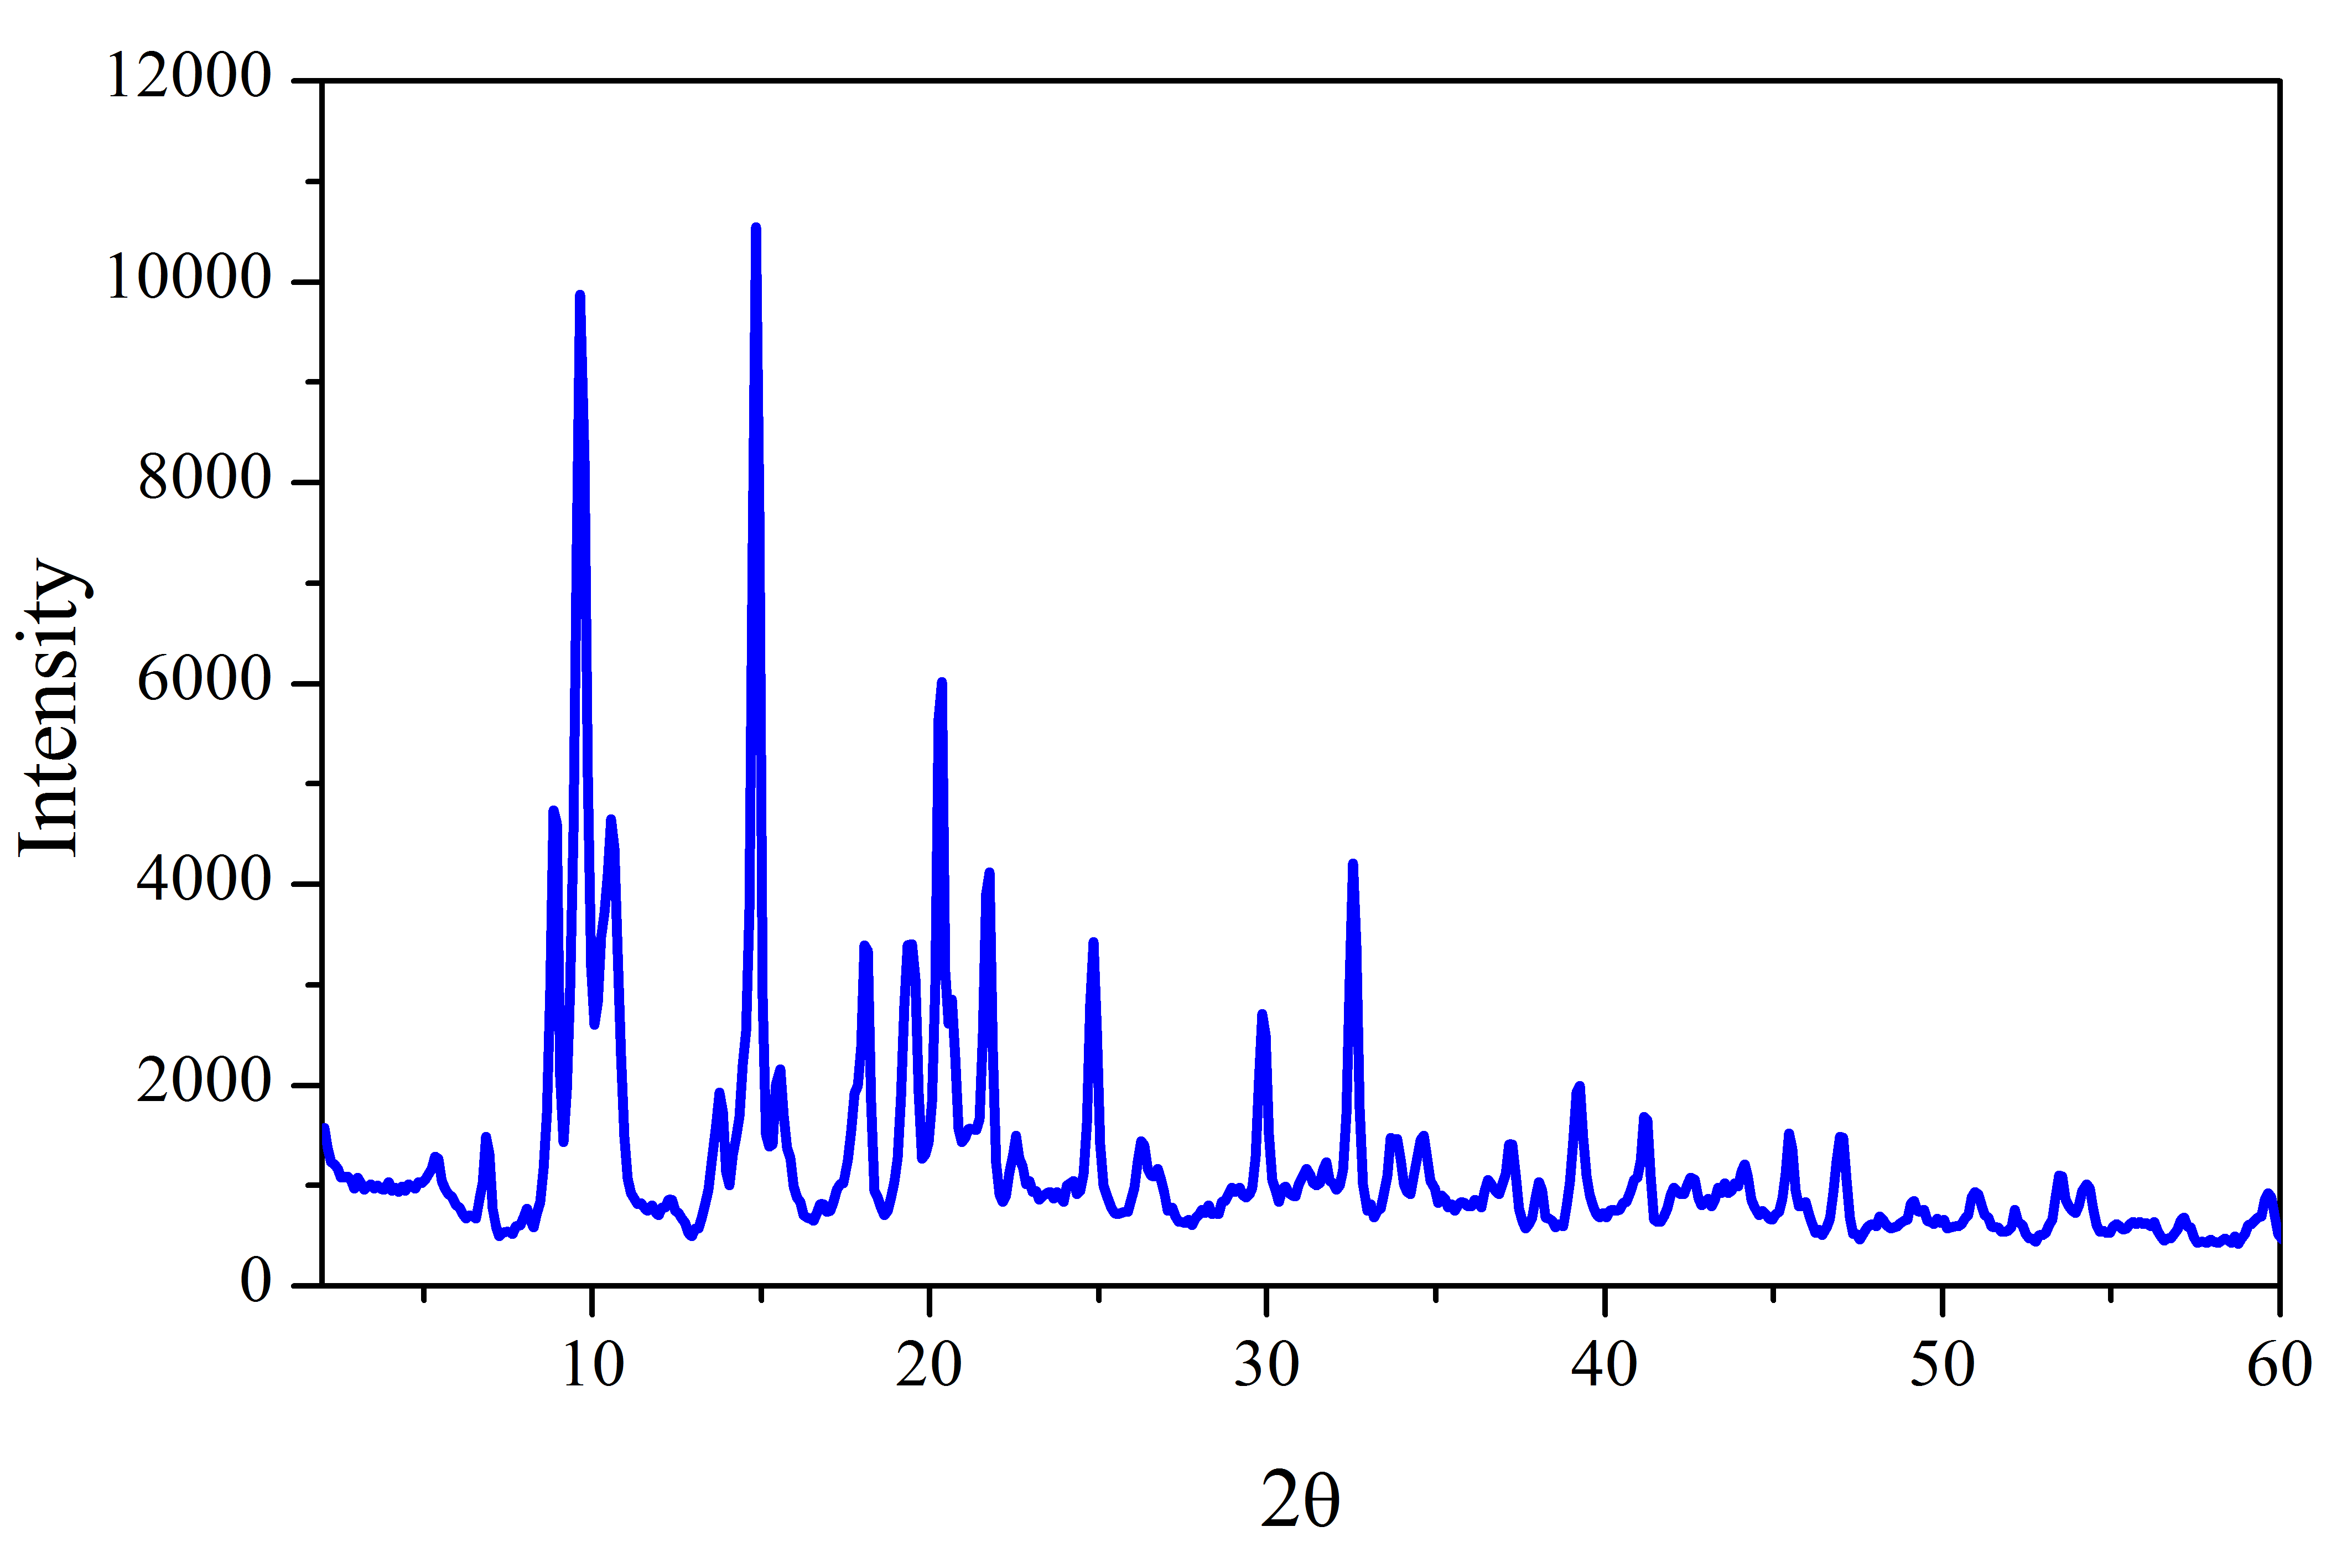
FIGURE 1S: XRD pattern of MOF-5 after synthesis

Supplement: f1 [file 8095737.f1.docx]
